# Supplementary material for: Optimization of phosphorus-loaded Ni–ZnO crosslinked carboxy methyl cellulose-based biodegradable nanocomposite hydrogel beads for the slow release of P, Ni and Zn: a kinetic approach
Source: Royal Society of Chemistry journal article supplement (doi:10.1039/d3nj00665d), 2023-01-01
Supplement: d3nj00665d1.pdf [file d3nj00665d1.pdf]

## Supplementary Materials

### **Optimization of phosphorus loaded Ni-ZnO crosslinked carboxy methyl cellulose-based biodegradable nanocomposite hydrogel beads for the slow release of P, Ni and Zn: A kinetic approach**

Madhusmita Baruah<sup>a</sup>, Arup Borgohain<sup>a,b</sup>, Rimjim Gogoi<sup>a</sup>, Nilotpall Borah<sup>c</sup>, Diganta Deka<sup>b</sup>,  
Tanmoy Karak<sup>b</sup>, Jiban Saikia<sup>a,\*</sup>

<sup>a</sup>Department of Chemistry, Dibrugarh University, Dibrugarh 786004, Assam, India

<sup>b</sup>Upper Assam Advisory Centre, Tea Research Association, Dikom 786101, Assam, India

<sup>c</sup>Surface Chemistry, Oil and Natural Gas Corporation Ltd., Sivasagar 785640, Assam, India

\* Corresponding author

E-mail address: [jibansaikia@dibru.ac.in](mailto:jibansaikia@dibru.ac.in) (J. Saikia)

## Release kinetics

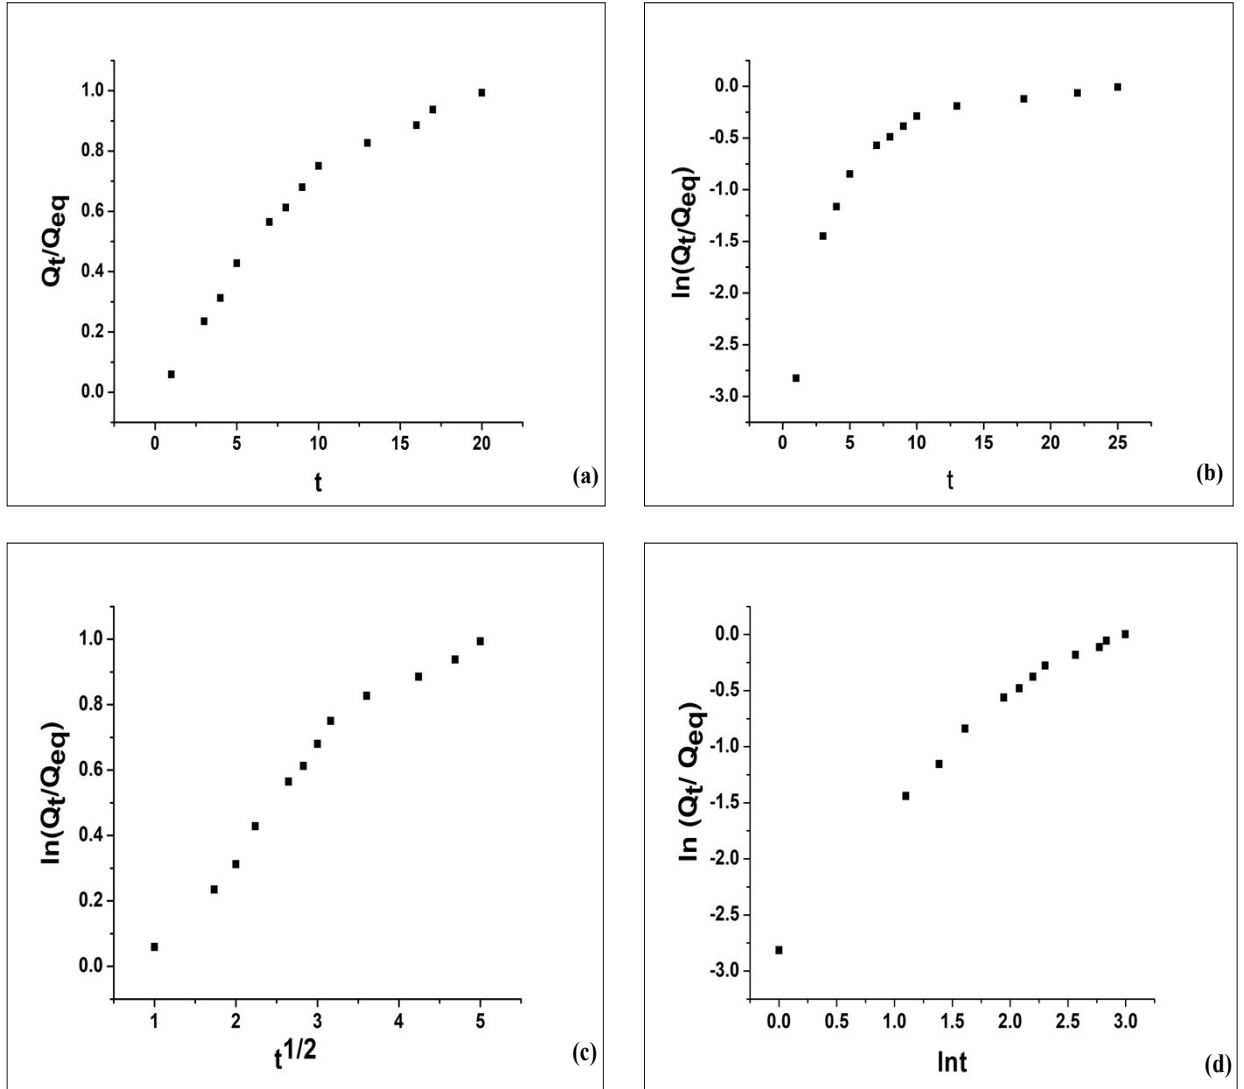

**Fig.S1:** Swelling Kinetics graphs for (a) Zero order (b) First order (c) Higuchi (d) Korsmeyer-Peppas Model.
